# Supplementary material for: Bone loss is ameliorated by fecal microbiota transplantation through SCFA/GPR41/ IGF1 pathway in sickle cell disease mice
Source: PubMed Central journal article supplement (PMC9712597; doi:10.1038/s41598-022-25244-9), 2022-11-30
Supplement: 41598_2022_25244_MOESM1_ESM.pdf [file 41598_2022_25244_MOESM1_ESM.pdf]

## **Supplemental Figures**

### **Bone Loss is Ameliorated by Fecal Microbiota Transplantation through SCFA/GPR41/ IGF1 Pathway in Sickle Cell Disease Mice**

Liping Xiao<sup>1</sup> \*, Yanjiao Zhou<sup>1</sup>, Suresh Bokoliya<sup>1</sup>, Qingqi Lin<sup>1</sup>, Marja Hurley<sup>1</sup>

<sup>1</sup>Department of Medicine, School of Medicine, UConn Health, Farmington, CT, 06030, USA

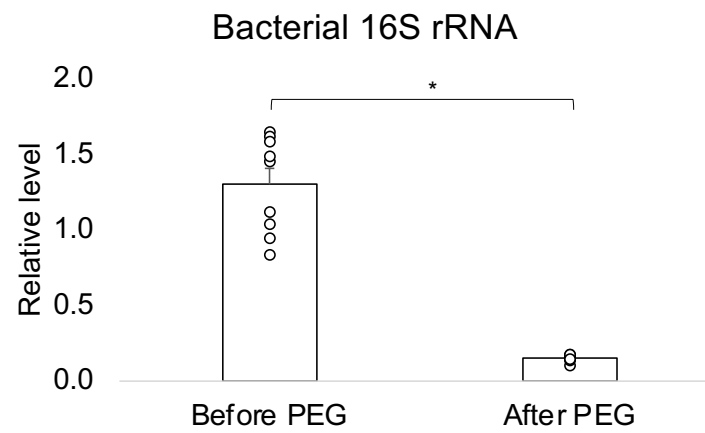

**Supplemental Figure 1. Decreased bacterial load after PEG treatment in Ctrl mice. n=9 mice/group. Data are Mean±SE. \* $p$ <0.05 by T test.**

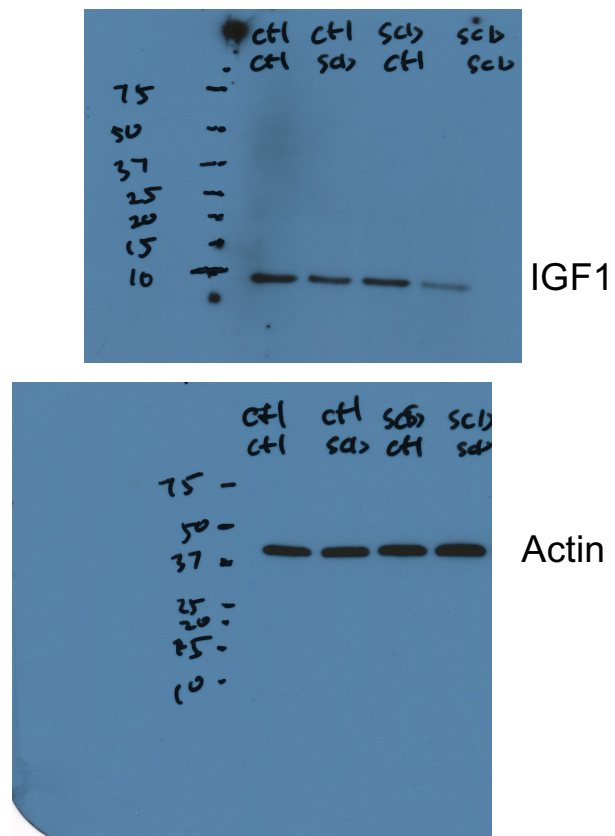

Supplemental Figure 2. Uncropped Western blots for Figure 7E.
